# Supplementary material for: Constructing asymmetric dual active sites through symbiotic effect for achieving efficient and selective photoreduction of CO2 to C2H4
Source: Royal Society of Chemistry journal article supplement (doi:10.1039/d4ee01376j), 2024-01-01
Supplement: d4ee01376j1.pdf [file d4ee01376j1.pdf]

**Electronic Supplementary Information (ESI)**

**Constructing asymmetric dual active sites through symbiotic effect for achieving efficient and selective photoreduction of CO<sub>2</sub> to C<sub>2</sub>H<sub>4</sub>**

Yong Xu,<sup>#a</sup> Ping Wang,<sup>#a</sup> Man Zhang,<sup>a</sup> Weili Dai,<sup>\*a</sup> Yuxuan Xu,<sup>a</sup> Jian-Ping Zou<sup>a</sup> and Xubiao Luo<sup>ab</sup>

*<sup>a</sup>Key Laboratory of Jiangxi Province for Persistent Pollutants Prevention Control and Resource Reuse, Nanchang Hangkong University, Nanchang 330063, P. K. China.*

*<sup>b</sup>School of Life Science, Jinggangshan University, Ji'an 343009, P. R. China*

\*Corresponding Author

E-mail: wldai81@126.com

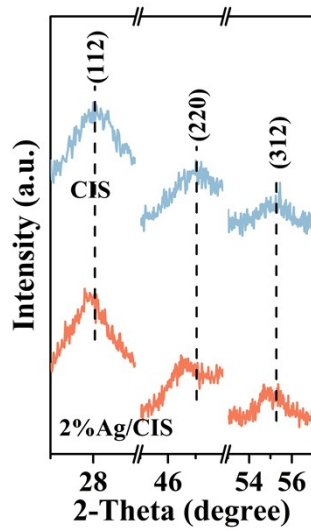

**Fig. S1.** Localized magnified XRD diffraction patterns of CIS and 2%Ag/CIS.

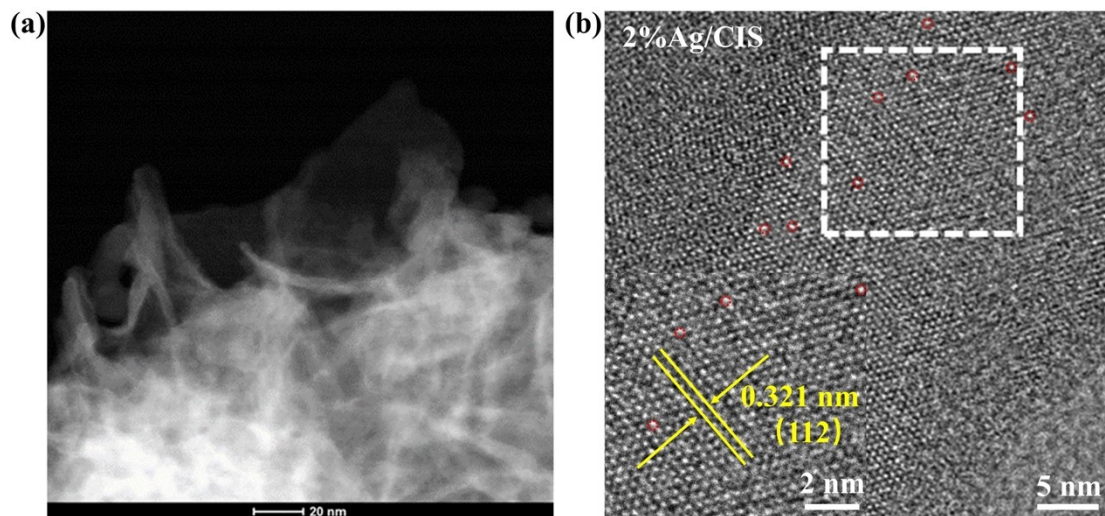

**Fig. S2.** TEM (a) and HRTEM (b) images of 2%Ag/CIS.

After heteroatom Ag substituting Cu atom, the binding ability of Ag and S is weaker than Cu and S due to poor ability of electron donating (Ag 0.30 e, Cu 0.42 e) (Fig. S11). Therefore, electron nonequilibrium and lattice mismatch are formed with Ag confinement. The adjacent S atom escapes from the lattice to produce  $S_v$ . The

coordination numbers of Ag and Cu as well as In atoms around  $S_v$  decrease. The S atom is tightly pulled by other metal atoms, causing a longer Ag-S bond length (2.40 Å, Table S1) than the normal Cu-S bond length (2.334 Å) in  $\text{CuInS}_2$ . Ag-S enlargement leads to lattice and interlayer broadening. Meanwhile, Cu-S bond lengths (2.334 Å) around the  $S_v$  area emerge distorted to accomplish thermodynamic stability. Atomic arrangement variation brings about huge morphological changes. And thus  $\text{CuInS}_2$  transforms from nanoparticles to nanosheets.

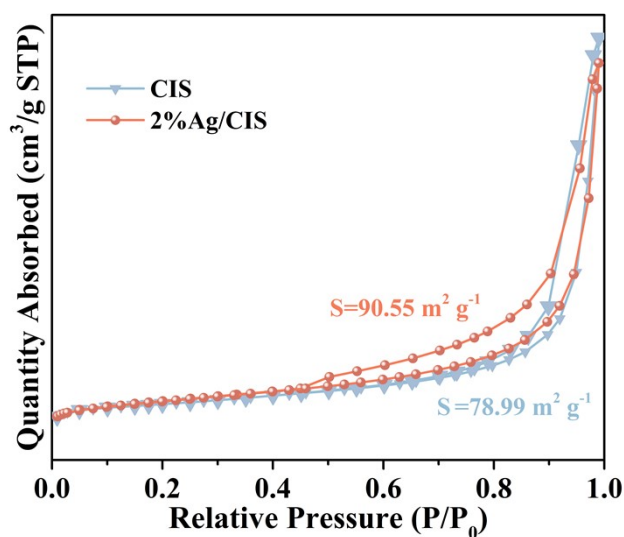

**Fig. S3.**  $\text{N}_2$  adsorption–desorption isotherm diagrams of CIS and 2%Ag/CIS.

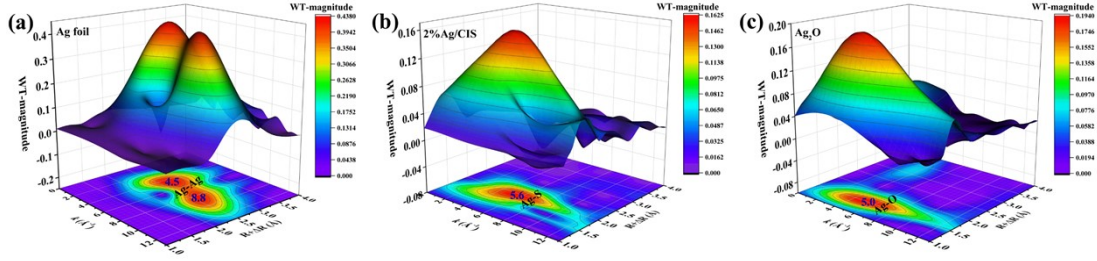

**Fig. S4.** The WT of (a) Ag foil, (b) 2%Ag/CIS and (c) Ag<sub>2</sub>O.

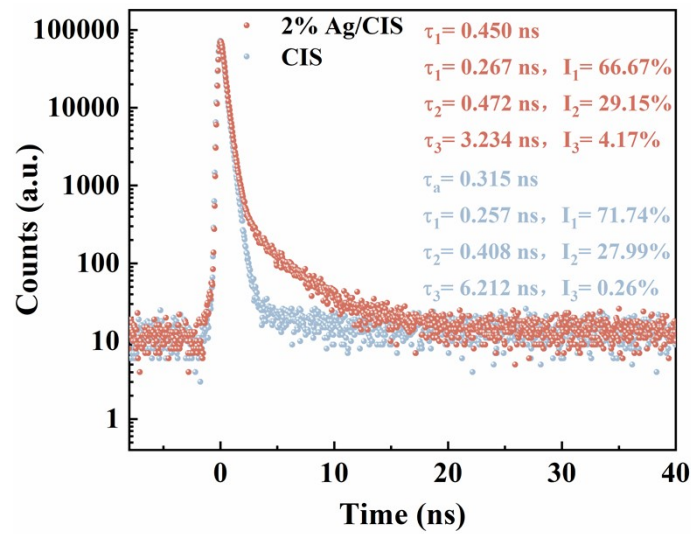

**Fig. S5.** Results of positron annihilation experiments.

The corresponding intensity obtained from the positron annihilation lifetime spectrum can be used to infer the degree of defect. The lifetime of positrons trapped in these defects will be longer than their lifetime in non-defective crystals. As shown in Fig. S5, the short lifetime of  $\tau_1$  represents the annihilation life of non-defective materials, while long lifetime  $\tau_2$  represents the lifetime of positrons in the captured state. The  $\tau_3$  attributes to the annihilation of positrons formed in the intergranular region

characterized by large volume. According to formula

$$C_d = \frac{I_2}{\mu I_1} \left( \frac{1}{\tau_b} - \frac{1}{\tau_2} \right) \frac{1}{\left( \frac{1}{\tau_b} + \frac{1}{\tau_2} \right)} = \frac{I_1}{I_2} \frac{I_2}{\tau_2},$$

the relative strength of  $I_2$  generally reflects the degree of defect concentration.

Therefore, whether analyzed from the lifetime ( $\tau_a$  or  $\tau_2$ ) or  $I_2$  strength, the defect concentration of 2%Ag/CIS is much higher than that of pure CIS. Combined with the EPR test results, it is sufficient to confirm that the content of  $S_v$  in 2%Ag/CIS is high.

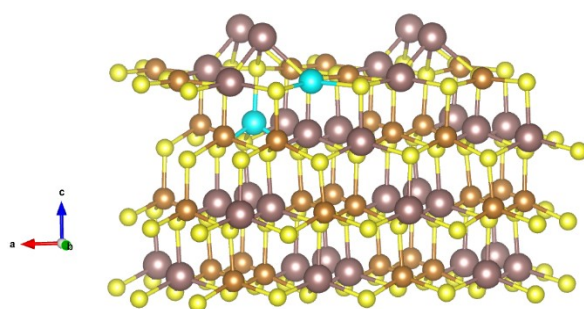

**Fig. S6.** The model of Ag/CIS(without  $S_v$ ).

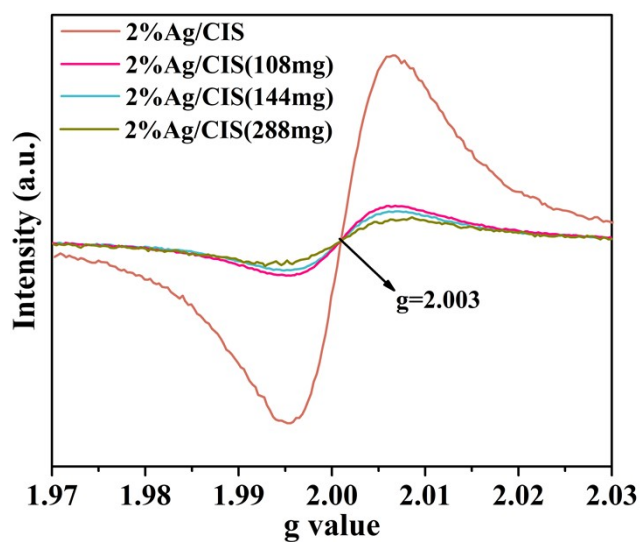

**Fig. S7.** ESR spectra. During the 2%Ag/CIS preparation process, the amount of TAA increased from 72 mg to 108, 144 and 288 mg, while other conditions remained unchanged.

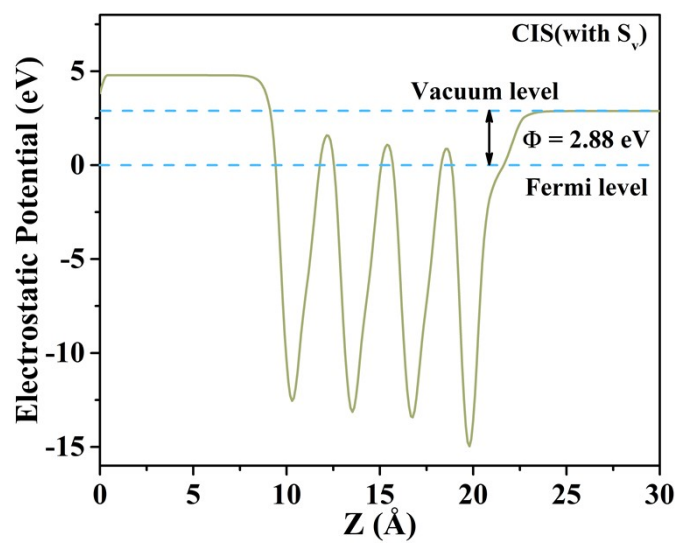

**Fig. S8.** The calculated electrostatic potentials of CIS(with  $S_v$ ).

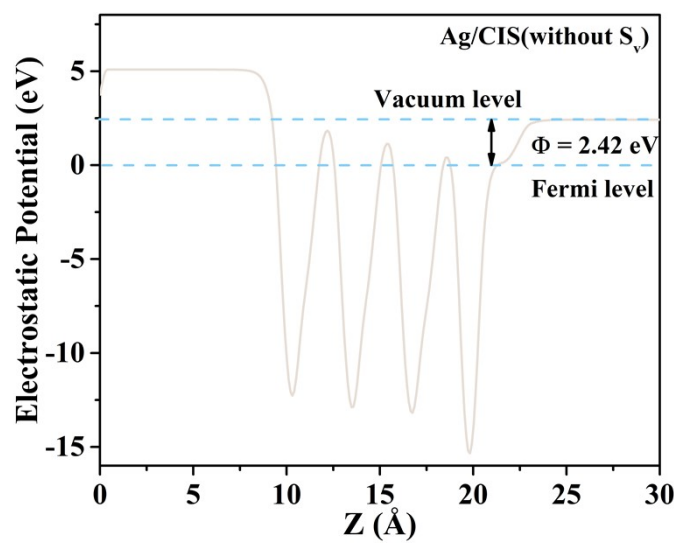

**Fig. S9.** The calculated electrostatic potentials of Ag/CIS(without  $S_v$ ).

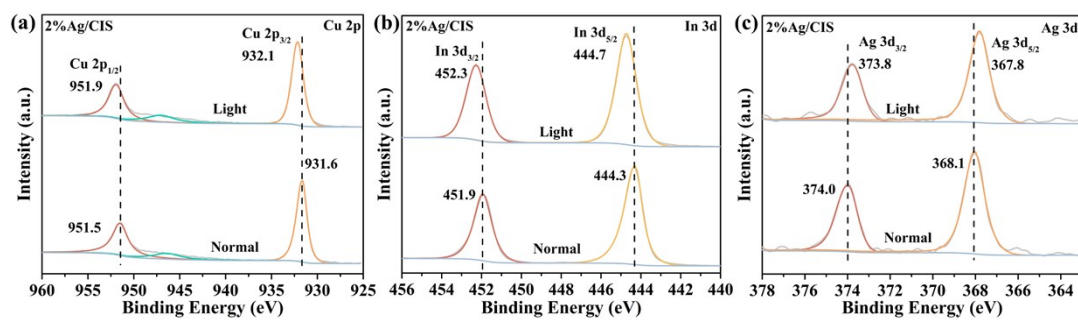

**Fig. S10.** In situ XPS spectra of (a) Cu 2p, (b) In 3d and (c) Ag 3d.

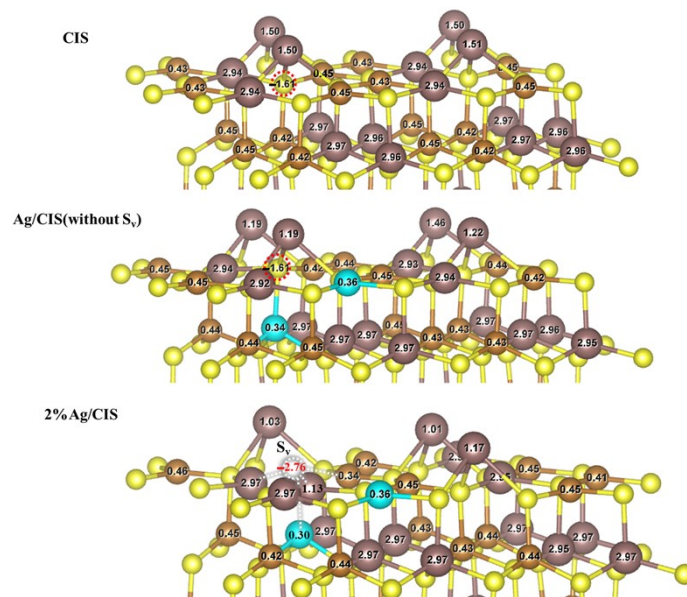

**Fig. S11.** Differential charge maps of CIS, Ag/CIS(without S<sub>v</sub>) and 2%Ag/CIS. Positive values represent the number of electrons lost, while negative values represent the number of electrons obtained.

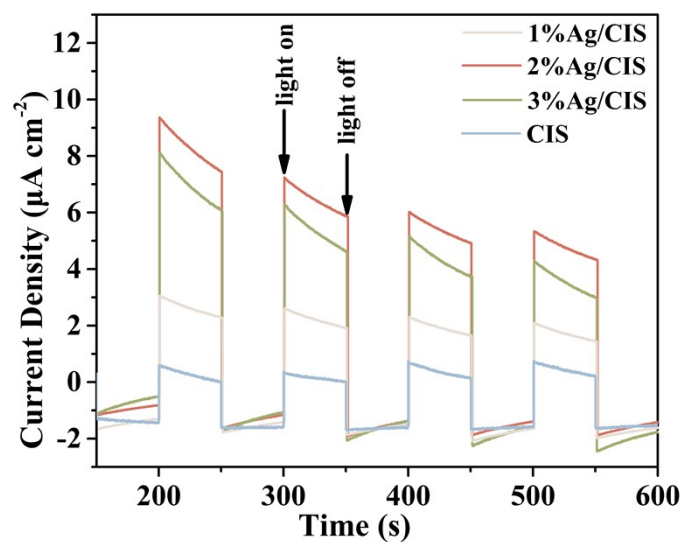

Fig. S12. Transient photocurrent response.

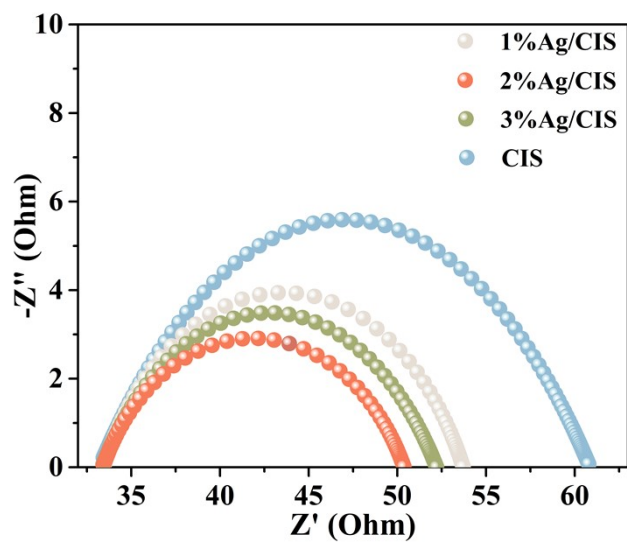

Fig. S13. EIS Nyquist plots.



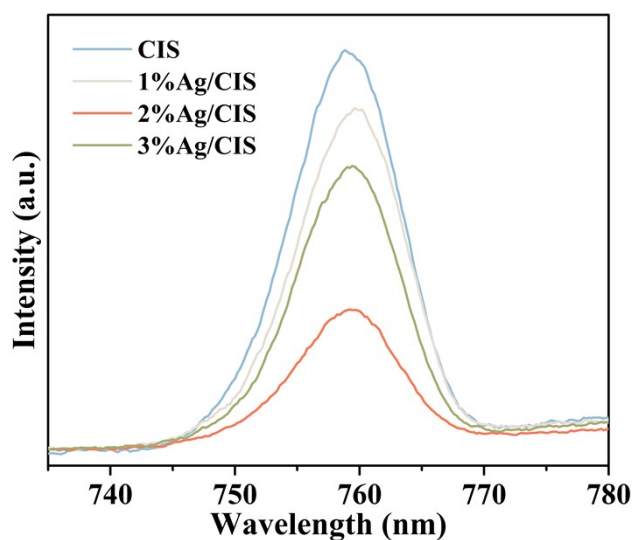

**Fig. S14.** Steady-state PL spectra.

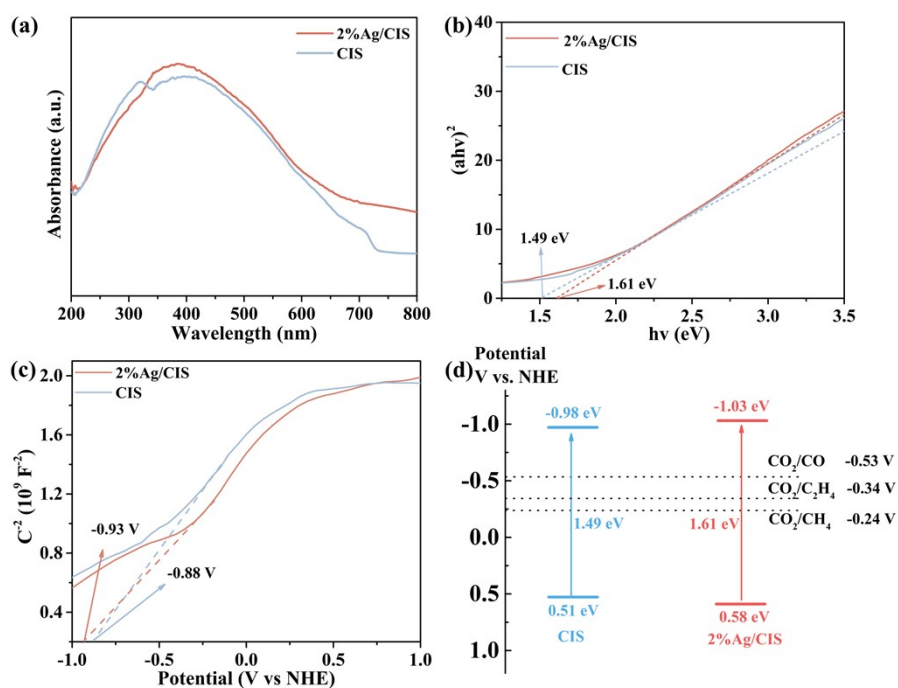

**Fig. S15.** (a) UV-vis diffuse reflectance spectra (DRS), (b) obtained bandgaps of 1.49 eV and 1.61 eV, estimated by plotting  $(\alpha hv)^2$  versus  $hv$  (Tauc plot).  $\alpha$  and  $v$  are the absorbance and wavenumber. (c) Mott-Schottky plots. (d) Electronic band structure alignments. According to the Mott-Schottky plots, the flat band potentials of CIS and

2%Ag/CIS are -0.88 V and -0.93 V, respectively. Usually, the conduction band potential of n-type semiconductors is about 0.1 V lower than that of flat band.<sup>1</sup> Therefore, the minimum conduction band values (CB) of CIS and 2%Ag/CIS are -0.98 V and -1.03 V, respectively.

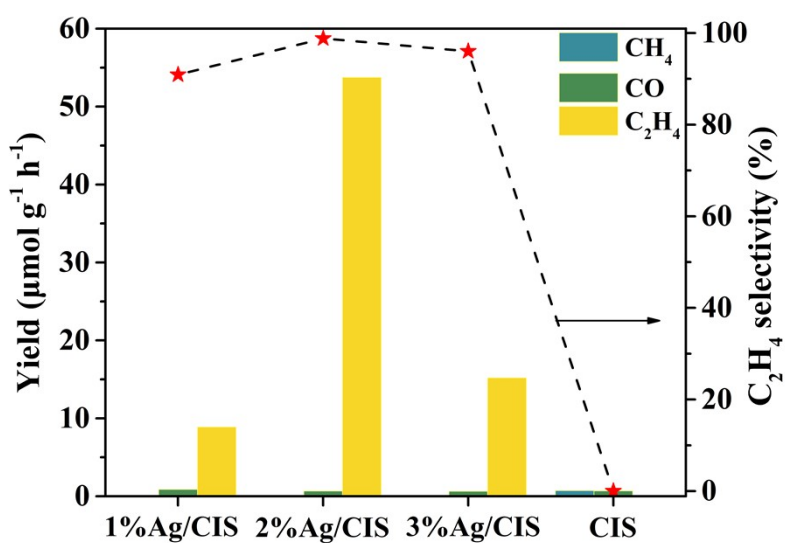

**Fig. S16.** Comparison of photoreduction product yield and ethylene selectivity.

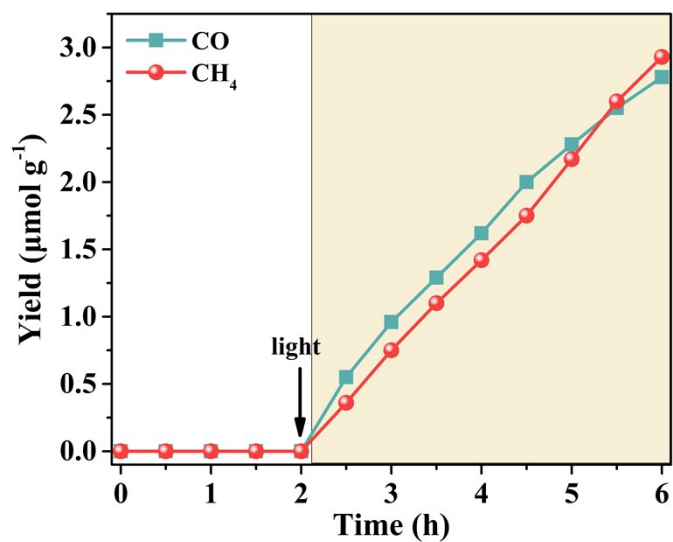

**Fig. S17.** Products of photocatalytic CO<sub>2</sub> reduction for CIS.

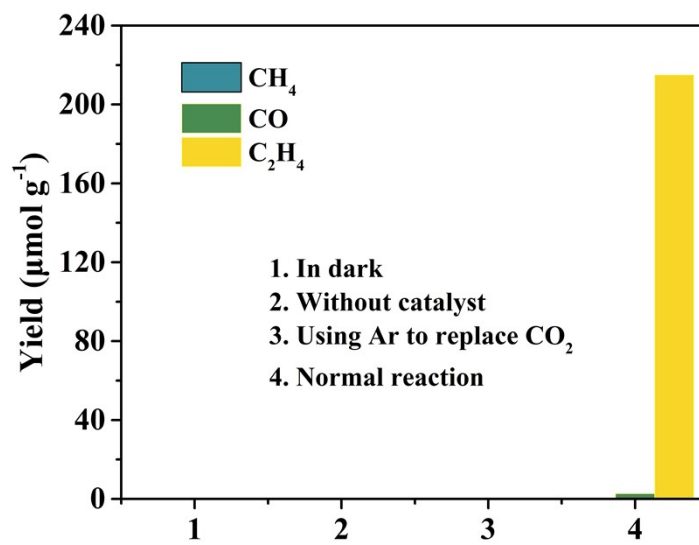

**Fig. S18.** Control experiments for 2%Ag/CIS.

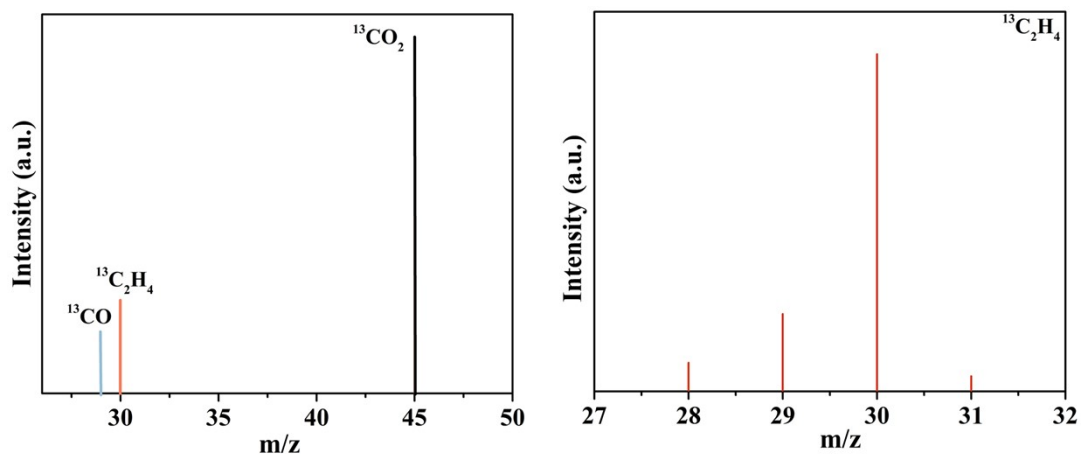

**Fig. S19.** The mass spectra analysis of products over 2%Ag/CIS with  $^{13}\text{CO}_2$  as feedstock.

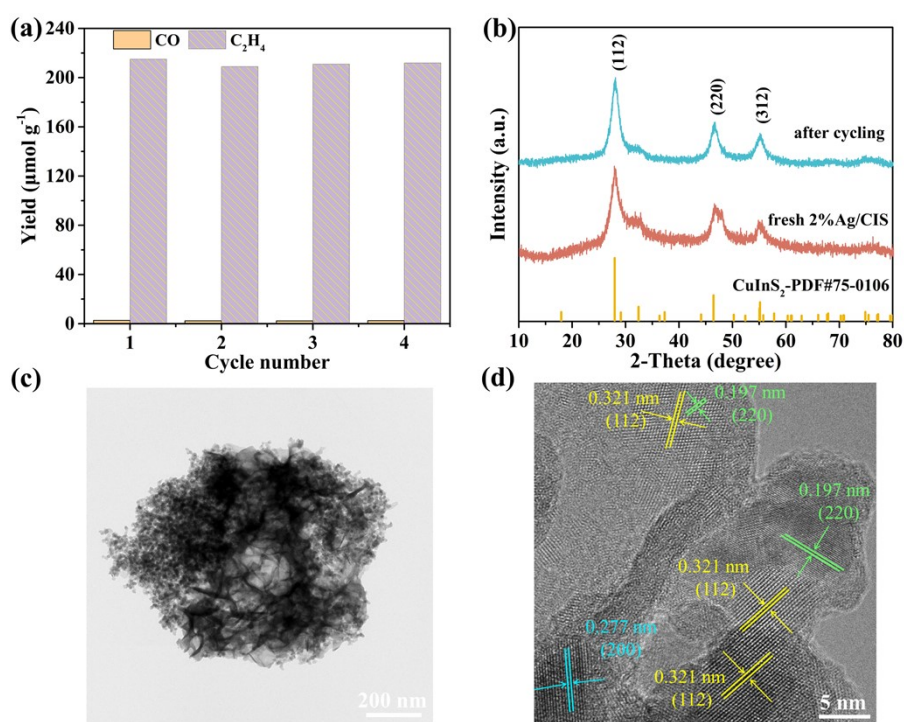

**Fig. S20.** (a) Cyclic experiment of 2%Ag/CIS. (b) Comparison of XRD before and after cyclic experiment. (c, d) TEM and HRTEM images after cyclic experiment.

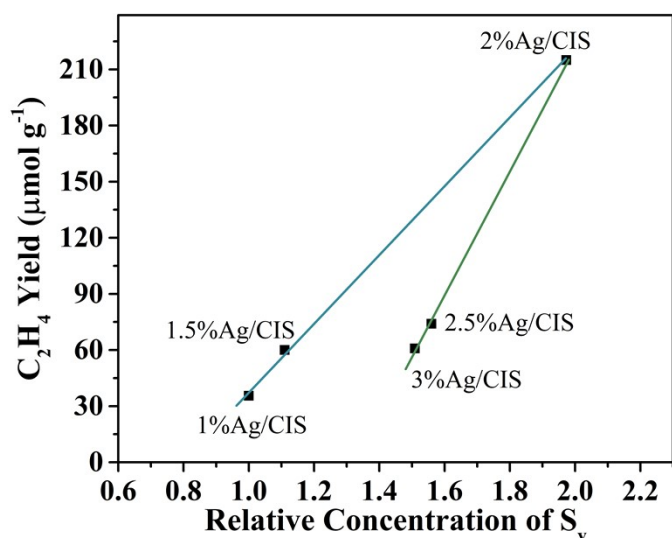

**Fig. S21.** The relationship between  $S_v$  concentration and  $C_2H_4$  yield.

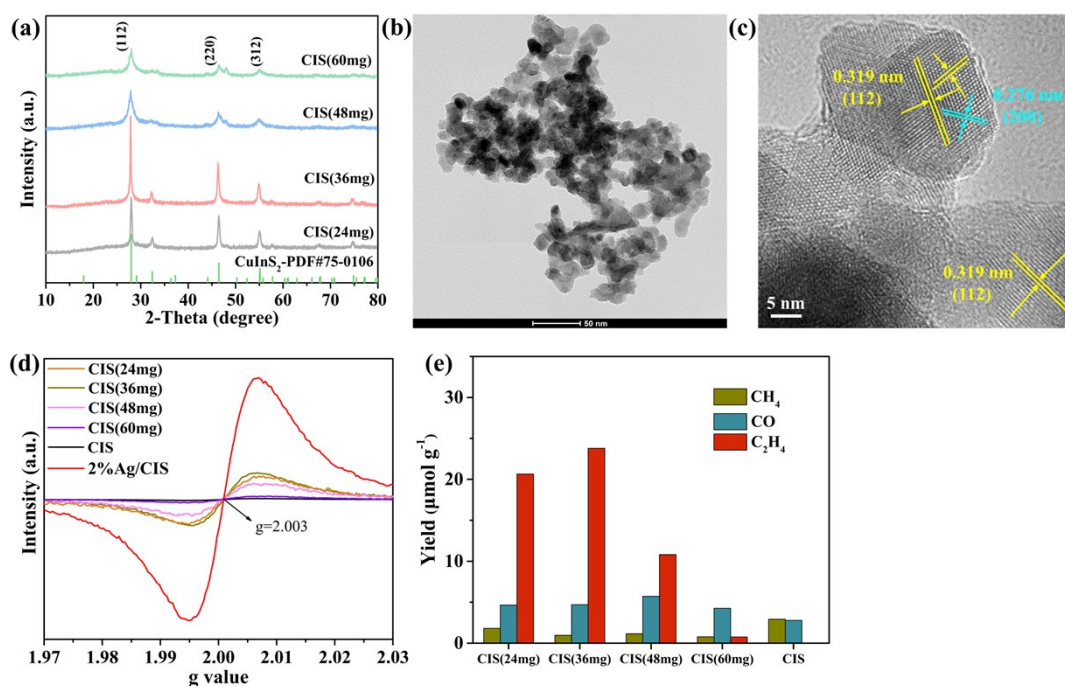

**Fig. S22.** (a) Pure phase  $CuInS_2$  materials prepared by reducing TAA dosages, (b, c) corresponding TEM images, (d) ESR spectra, (e) comparison of catalytic performance.

Without adding  $AgNO_3$  and keeping other preparation conditions unchanged, the dosage of TAA was reduced from 72 mg to 60, 48, 36, and 24 mg, and the resulting

materials are labeled as CIS(60mg), CIS(48mg), CIS(36mg) and CIS(24mg), respectively. The XRD patterns of the prepared materials are shown in Fig. S23a below. It can be seen that although the materials obtained with a decrease in TAA dosage are all pure phase CuInS<sub>2</sub>, the quality of obtained materials decreases with a decrease in TAA dosage. The narrowing of the half peak width of the (112) crystal plane in CIS(36mg) material may be caused by the enlargement of the nanoparticles. From TEM images (Fig. S23bc) of CIS(36mg), it can be seen that the morphology is consistent with CIS as nanoparticles, without the formation of sheet-like structure or change in lattice width. Additionally, ESR testing shows that the S<sub>v</sub> intensity of CIS(36mg) is the highest but much lower than that of 2%Ag/CIS (Fig. S23d). This result indicates that the presence of Ag-S<sub>v</sub>-In structure is beneficial for stabilizing high concentration S<sub>v</sub>. The performance comparison results of above materials are shown in Fig. S23e, when the TAA dosage is reduced to 60 mg, CIS(60mg) acts as a catalyst for photocatalytic reduction of CO<sub>2</sub> to produce a small amount of C<sub>2</sub>H<sub>4</sub> (0.76 μmol g<sup>-1</sup>). When the TAA dosage is reduced to 36 mg, the prepared CIS(36 mg) catalyzes CO<sub>2</sub> reduction to produce C<sub>2</sub>H<sub>4</sub> at a rate of 23.8 μmol g<sup>-1</sup>, which is much lower than the catalytic capacity of 2%Ag/CIS (215 μmol g<sup>-1</sup>). The performance comparison results confirm the stability of Ag-S<sub>v</sub>-In structure and the important role of S<sub>v</sub> in catalysis.

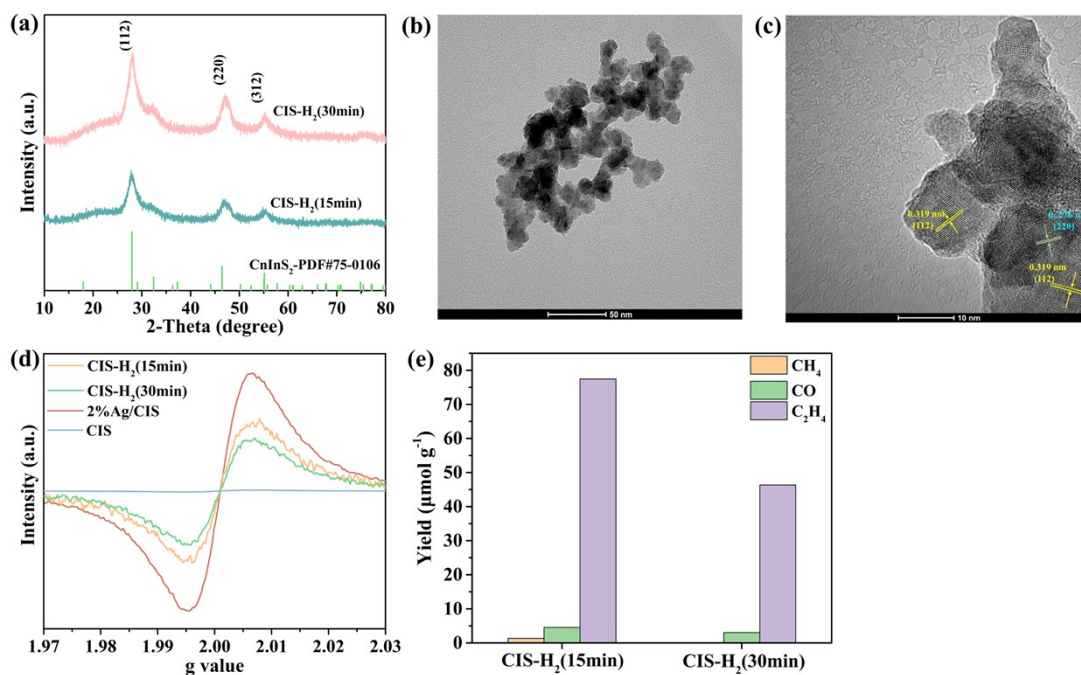

**Fig. S23.** (a) Prepared CuInS<sub>2</sub> materials with H<sub>2</sub> reduction, (b, c) corresponding TEM images, (d) ESR spectra, (e) comparison of catalytic performance.

CuInS<sub>2</sub> nanoparticles (50 mg) were heated at 180 °C in a 5%H<sub>2</sub>/Ar atmosphere for 15 and 30 min, the obtained materials are marked as CIS-H<sub>2</sub>(15min) and CIS-H<sub>2</sub>(30min) respectively. The XRD patterns of the prepared materials are shown in Fig. S24a below, CIS-H<sub>2</sub>(15min) and CIS-H<sub>2</sub>(30min) are all pure phase CuInS<sub>2</sub>. The materials obtained from H<sub>2</sub> reduction of CIS are still nanoparticles (Fig. S24b), without the formation of sheet-like structure or change in lattice width (Fig. S24c). In ESR testing (Fig. S24d), the S<sub>v</sub> concentrations of CIS-H<sub>2</sub> materials are higher than that of CIS(36mg), but significantly lower than that of 2%Ag/CIS, which further confirms that the presence of Ag-S<sub>v</sub>-In structure is beneficial for stabilizing high concentration S<sub>v</sub>. And the performance comparison results are shown in Fig. S24e, when CIS-H<sub>2</sub>(15min) is used as a photocatalyst, the rate of C<sub>2</sub>H<sub>4</sub> production is 77 μmol g<sup>-1</sup>, which is much lower than the catalytic capacity of 2%Ag/CIS (215 μmol g<sup>-1</sup>). This result further proves

that it is possible to obtain  $C_2H_4$  as long as there are dual sites of  $S_V$  and In, and also proves that Ag- $S_V$ -In can stabilize high concentration  $S_V$ .

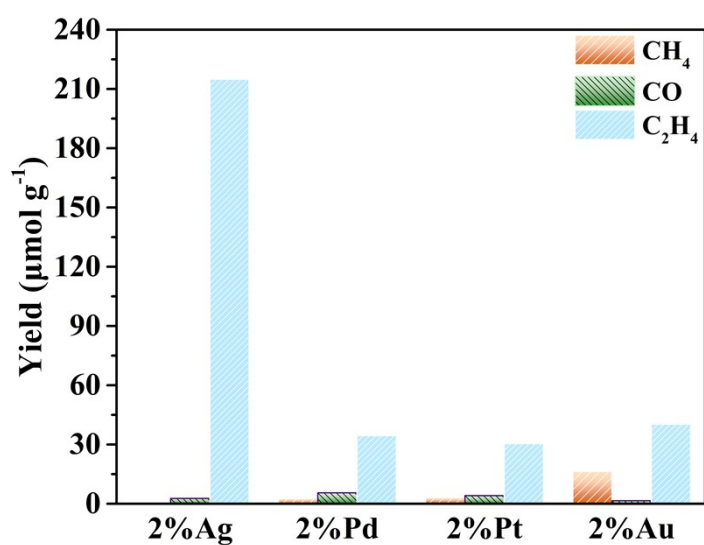

**Fig. S24.** Comparison of photocatalytic performance with other metal-doped CIS.

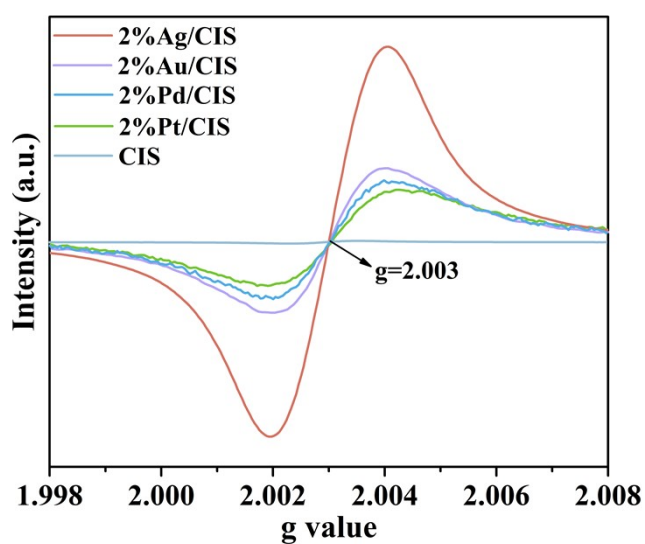

**Fig. S25.** Comparison of ESR signals of CIS doped with different metals.



The valence state of Cu in CuInS<sub>2</sub> material is +1, and the doping atom tended to substitute an atom with the same approximate valence state. Therefore, Ag is likely to replace Cu atom. On the other hand, the solubility product constant of Ag<sub>2</sub>S ( $K_{sp}=6.3 \times 10^{-50}$ ) is smaller than that of Cu<sub>2</sub>S ( $K_{sp}=2.5 \times 10^{-48}$ ) and CuS ( $K_{sp}=1.3 \times 10^{-36}$ ), making it easier for Ag to bond with S. However, precious metals of Au, Pd, and Pt have weak bonding with S, as a result, the concentration of S<sub>v</sub> formed is relatively small. And as displayed in Fig. S21, a large amount of S<sub>v</sub> is generated after Ag doping, while the concentration of S<sub>v</sub> formed after noble metal Au, Pd, and Pt doping is much lower. Due to the important role of S<sub>v</sub> in the adsorption and activation of CO<sub>2</sub> molecules, so Ag doped CIS has the highest activity. In addition, Ag doping triggers the symbiotic effect to promote the formation of S<sub>v</sub>, while the presence of Ag-S<sub>v</sub>-In structure can promote the stable existence of high concentration S<sub>v</sub>. And the photogenerated electrons captured by Ag single atoms can be selectively transferred to S<sub>v</sub>, which is beneficial for the adsorption, activation, and hydrogenation reduction reactions of CO<sub>2</sub> molecules.

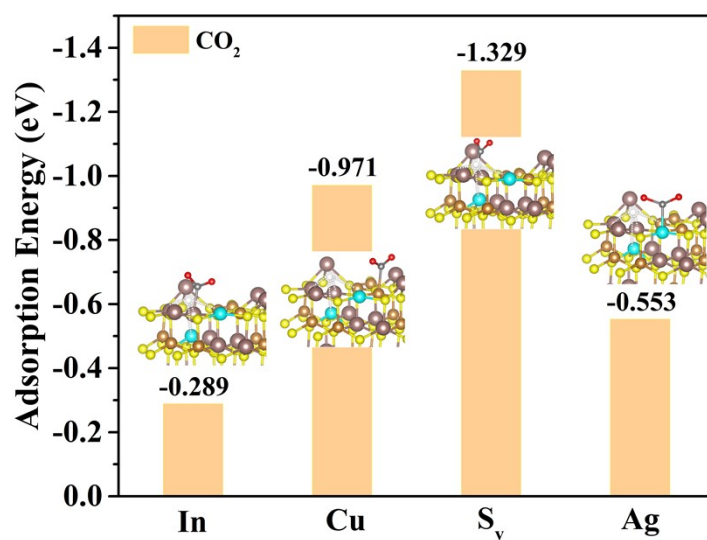

**Fig. S26.** Calculated CO<sub>2</sub> adsorption energies and corresponding structures.

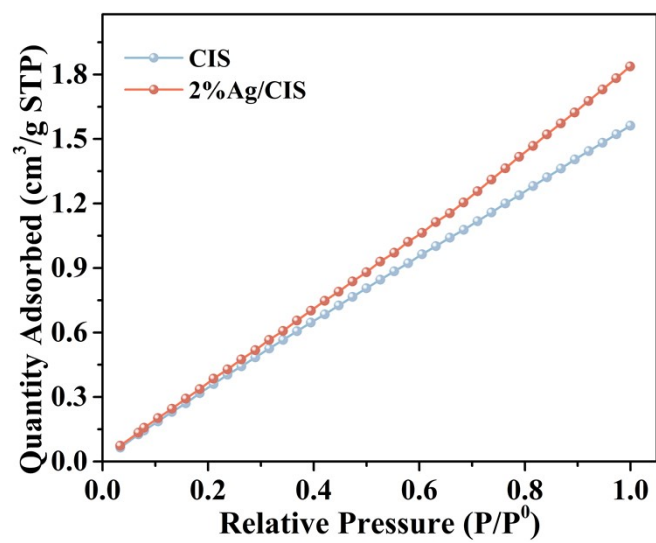

**Fig. S27.** The adsorption curves of CO<sub>2</sub> with CIS and 2%Ag/CIS.

**Table S1.** EXAFS fitting parameters at the Ag K-edge for various samples ( $S_0^2=0.722$ ).

| Sample       | Shell | CN <sup>a</sup> | R(Å) <sup>b</sup> | $\sigma^2(\text{Å}^2)$ <sup>c</sup> | $\Delta E_0(\text{eV})$ <sup>d</sup> | R factor |
|--------------|-------|-----------------|-------------------|-------------------------------------|--------------------------------------|----------|
| Ag foil      | Ag-Ag | 12*             | 2.860±0.00<br>1   | 0.0094±0.0002                       | 1.2±0.3                              | 0.0031   |
| Sample<br>Ag | Ag-S  | 2.8±0.<br>5     | 2.396±0.01<br>4   | 0.0093±0.0026                       | -4.3±3.1                             | 0.0197   |

<sup>a</sup>CN, coordination number; <sup>b</sup>R, the distance to the neighboring atom; <sup>c</sup> $\sigma^2$ , the Mean Square Relative Displacement (MSRD); <sup>d</sup> $\Delta E_0$ , inner potential correction; R factor indicates the goodness of the fit.  $S_0^2$  was fixed to 0.722, according to the experimental EXAFS fit of Ag foil by fixing CN as the known crystallographic value. \* This value was fixed during EXAFS fitting, based on the known structure of Ag. Fitting range:  $3.0 \leq k (\text{Å}^{-1}) \leq 14.1$  and  $1.0 \leq R (\text{Å}) \leq 3.3$  (Ag foil);  $2.0 \leq k (\text{Å}^{-1}) \leq 10.0$  and  $1.0 \leq R (\text{Å}) \leq 3.0$  (Sample Ag). A reasonable range of EXAFS fitting parameters:  $0.700 < S_0^2 < 1.000$ ;  $CN > 0$ ;  $\sigma^2 > 0 \text{ Å}^2$ ;  $|\Delta E_0| < 10 \text{ eV}$ ; R factor  $< 0.02$ .

**Table S2.** The content of various elements in 2%Ag/CIS photocatalyst measured by ICP-OES.

| <b>Element</b> | <b>Mass Fraction (wt%)</b> | <b>Molar ratio</b> |
|----------------|----------------------------|--------------------|
| Ag             | 0.98                       | 0.02               |
| Cu             | 25.75                      | 1.00               |
| In             | 47.34                      | 1.02               |
| S              | 25.93                      | 2.00               |

The atomic fraction of Ag is calculated using the molar amount of Ag compared to the total molar amount of Ag and Cu. The molar ratio of Ag to Cu is 0.02:1, so the atomic fraction of Ag is  $0.02/(0.02+1) \times 100\%$ , which is nearly 2%. Therefore, the obtained material is labeled as 2%Ag/CIS.

**Table S3.** Comparison of the reaction conditions and performances with other catalysts for photocatalytic CO<sub>2</sub> reduction to C<sub>2</sub>H<sub>4</sub>.

|    | Catalyst                                             | Light source                                                            | Reaction condition                                                           | Products and activity (μmol g <sup>-1</sup> h <sup>-1</sup> )                                 | Seletivity of C <sub>2</sub> H <sub>4</sub> | Mass of catalysts | References |
|----|------------------------------------------------------|-------------------------------------------------------------------------|------------------------------------------------------------------------------|-----------------------------------------------------------------------------------------------|---------------------------------------------|-------------------|------------|
| 1  | 2%Ag/ClS                                             | 300 W Xe lamp with an AM 1.5G filter                                    | Gas-solid, H <sub>2</sub> O                                                  | C <sub>2</sub> H <sub>4</sub> : 53.74; CO: 0.68                                               | 98.8%                                       | 5 mg              | This work  |
| 2  | CuACS/P CN                                           | high-pressure 300 W Xe lamp                                             | Gas-solution, H <sub>2</sub> O, [Ru(bpy) <sub>3</sub> ] <sup>2+</sup> , TEOA | C <sub>2</sub> H <sub>4</sub> : 10.17; CH <sub>4</sub> : 8.95                                 | 53.2%                                       | 5 mg              | Ref. 2     |
| 3  | BPQDs-WO <sub>3</sub>                                | 300 W Xe lamp                                                           | Gas-solid, H <sub>2</sub> O                                                  | C <sub>2</sub> H <sub>4</sub> : 11.0; CO: 72.47                                               | 13.2%                                       | 10 mg             | Ref. 3     |
| 4  | Cu <sub>0.01</sub> /3DOM-TiO <sub>2</sub>            | Xe lamp (200 mW/cm <sup>2</sup> , 320-780 nm)                           | Gas-solution, H <sub>2</sub> O                                               | C <sub>2</sub> H <sub>4</sub> : 6.99; CH <sub>4</sub> : 3.45; CO: 1.50                        | 58.4%                                       | 5 mg              | Ref. 4     |
| 5  | Cu <sup>δ+</sup> /CeO <sub>2</sub> -TiO <sub>2</sub> | Xe lamp (200 mW/cm <sup>2</sup> , 320-850 nm)                           | Gas-solution, H <sub>2</sub> O                                               | C <sub>2</sub> H <sub>4</sub> : 4.51; CH <sub>4</sub> : 1.52; CO: 3.47                        | 47.5%                                       | 10 mg             | Ref. 5     |
| 6  | S <sub>v</sub> -CdS@ZIF-8                            | 300 W Xe lamp with a 420 nm cut-off filter                              | Gas-solid, H <sub>2</sub> O                                                  | C <sub>2</sub> H <sub>4</sub> : 0.8; CO: 5.83                                                 | 12.8%                                       | 20 mg             | Ref. 6     |
| 7  | CuGaS <sub>2</sub>                                   | 450 W Xe lamp (with UV cut-off filter (KG-2 filter and CGA-400) filter) | Gas-solution, H <sub>2</sub> O, pH=12 (0.1M NaOH)                            | C <sub>2</sub> H <sub>4</sub> : 20.6; CH <sub>4</sub> : 1.88; CO: 6.25; H <sub>2</sub> : 1.25 | 75.1%                                       | 5 mg              | Ref. 7     |
| 8  | MIL-88B-NS40                                         | 300 W Xe lamp with a 420 nm cut-off filter (200 mW/cm <sup>2</sup> )    | Gas-solid, H <sub>2</sub> O                                                  | C <sub>2</sub> H <sub>4</sub> : 17.7; CH <sub>4</sub> : 51.23; CO: 673.41                     | 10.6%                                       | 5 mg              | Ref. 8     |
| 9  | CGS/GS                                               | 300 W Xe lamp with a 420 nm cut-off filter (λ > 420 nm)                 | Gas-solid, H <sub>2</sub> O                                                  | C <sub>2</sub> H <sub>4</sub> : 18.0; CH <sub>4</sub> : 12.42; CO: 43.79                      | 24.3 %                                      | 20 mg             | Ref. 9     |
| 10 | CuO <sub>x</sub> @p-ZnO                              | 300 W Xe lamp (100 mW/cm <sup>2</sup> , 320-780 nm)                     | Gas-solid, H <sub>2</sub> O                                                  | C <sub>2</sub> H <sub>4</sub> : 2.7; CH <sub>4</sub> : 2.2; CO: 3.3                           | 32.9%                                       | 5 mg              | Ref. 10    |
| 11 | Mo-COF                                               | 300 W Xe lamp (λ ≥ 420 nm)                                              | Gas-solid, H <sub>2</sub> O                                                  | C <sub>2</sub> H <sub>4</sub> : 3.57; CH <sub>4</sub> : 1.08; CO: 6.19                        | 42.9%                                       | 10 mg             | Ref. 11    |

|    |                                                                               |                                                                               |                                                                                                   |                                                                                                                                                                            |        |       |         |
|----|-------------------------------------------------------------------------------|-------------------------------------------------------------------------------|---------------------------------------------------------------------------------------------------|----------------------------------------------------------------------------------------------------------------------------------------------------------------------------|--------|-------|---------|
| 12 | V <sub>s</sub> -<br>NiCo <sub>2</sub> S <sub>4</sub> -<br>NF                  | 300 W Xe lamp<br>(150 mW/cm <sup>2</sup> )                                    | Gas-solid,<br>H <sub>2</sub> O                                                                    | C <sub>2</sub> H <sub>4</sub> : 13.42;<br>CH <sub>4</sub> : 1.52;<br>CO: 8.57                                                                                              | 57.1 % | 20 mg | Ref. 12 |
| 13 | In-T/CN                                                                       | UV LED<br>(λ = 365 nm)                                                        | Gas-solid,<br>H <sub>2</sub> O                                                                    | C <sub>2</sub> H <sub>4</sub> : 1.41;<br>CH <sub>4</sub> : 7.31;<br>CO: 2.32                                                                                               | 12.8%  | 50 mg | Ref. 13 |
| 14 | CsPbBr <sub>3</sub>                                                           | 300 W Xe lamp<br>with an AM<br>1.5G filter                                    | Gas-solution,<br>ethyl acetate,<br>H <sub>2</sub> O                                               | C <sub>2</sub> H <sub>4</sub> : 9.3;<br>C <sub>3</sub> H <sub>8</sub> : 2.26;<br>C <sub>2</sub> H <sub>6</sub> : 3.42;<br>CH <sub>4</sub> : 3.78;<br>H <sub>2</sub> : 8.48 | 34.1%  | /     | Ref. 14 |
| 15 | CCN-W                                                                         | 300 W Xe lamp<br>(full spectrum<br>light Irradiation)                         | Gas-solution,<br>NaHCO <sub>3</sub><br>powder,<br>H <sub>2</sub> SO <sub>4</sub> (2 M,<br>0.3 mL) | C <sub>2</sub> H <sub>4</sub> : 1.71;<br>CH <sub>4</sub> : 4.45;<br>CO: 5.75                                                                                               | 14.4%  | 5 mg  | Ref. 15 |
| 16 | α-<br>Fe <sub>2</sub> O <sub>3</sub> /GR/<br>Bi <sub>2</sub> O <sub>2</sub> S | 300 W Xe lamp<br>with a 420 nm<br>cut-off filter<br>(100 mW/cm <sup>2</sup> ) | Gas-solid,<br>H <sub>2</sub> O                                                                    | C <sub>2</sub> H <sub>4</sub> : 2.88;<br>CH <sub>4</sub> : 4.27;<br>CO: 13.00                                                                                              | 14.3%  | 50 mg | Ref. 16 |
| 17 | Mildly<br>oxidized<br>FeCoS <sub>2</sub>                                      | 300 W Xe lamp<br>with an AM<br>1.5G filter (100<br>mW/cm <sup>2</sup> )       | Gas-solid,<br>H <sub>2</sub> O                                                                    | C <sub>2</sub> H <sub>4</sub> : 20.1;<br>CO: 4.13                                                                                                                          | 82.9%  | 10 mg | Ref. 17 |
| 18 | Bi <sub>2</sub> S <sub>3</sub> @In <sub>2</sub><br>S <sub>3</sub>             | Xe lamp of<br>different<br>wavelengths                                        | Gas-solid,<br>H <sub>2</sub> O                                                                    | C <sub>2</sub> H <sub>4</sub> : 11.81;<br>CO: 1.98                                                                                                                         | 86.0%  | 5 mg  | Ref. 18 |
| 19 | TCP/PP/Cu <sub>2</sub><br>O/LDH-<br>70                                        | 300 W Xe lamp<br>(100 mW/cm <sup>2</sup> )                                    | Gas-solution,<br>H <sub>2</sub> O                                                                 | C <sub>2</sub> H <sub>4</sub> : 1.56;<br>C <sub>2</sub> H <sub>6</sub> : 1.92;<br>CH <sub>4</sub> : 3.01;<br>CO: 26.18                                                     | 4.8%   | 50 mg | Ref. 19 |
| 20 | 0.15-<br>Cu <sub>2</sub> O@Cu<br>-CN                                          | 300 W Xe lamp<br>with a 420 nm<br>cut-off filter                              | Gas-solution,<br>H <sub>2</sub> O, TEOA                                                           | C <sub>2</sub> H <sub>4</sub> : 46.27;<br>CH <sub>4</sub> : 7.25<br>CO: 61.15<br>H <sub>2</sub> : 2.75                                                                     | 40.3%  | 50 mg | Ref. 20 |
| 21 | Cu <sub>1</sub> /TiO <sub>2</sub>                                             | Xe lamp (full<br>spectrum)                                                    | Gas-<br>solution,H <sub>2</sub> O,<br>TEOA                                                        | C <sub>2</sub> H <sub>4</sub> : 60.4;<br>CH <sub>4</sub> : 17.86<br>CO: 31.24                                                                                              | 75.2%  | 20 mg | Ref. 21 |
| 22 | 3.6-<br>Cu <sub>1</sub> /W <sub>18</sub> O<br><sub>49</sub>                   | 300 W Xe lamp<br>(453 mW/cm <sup>2</sup> )                                    | Gas-solid,<br>H <sub>2</sub> O                                                                    | C <sub>2</sub> H <sub>4</sub> : 4.9;<br>CH <sub>4</sub> : 2.2<br>CO: 5.1                                                                                                   | 72.8%  | 5 mg  | Ref. 22 |
| 23 | CCS-H1                                                                        | 300 W Xe lamp<br>with a 420 nm<br>cut-off filter                              | Gas-<br>solution,H <sub>2</sub> O                                                                 | C <sub>2</sub> H <sub>4</sub> : 30.02;<br>CO: 8.74                                                                                                                         | 77.5%  | 20 mg | Ref. 23 |

|    |                                                   |               |                                      |                                                                               |       |       |         |
|----|---------------------------------------------------|---------------|--------------------------------------|-------------------------------------------------------------------------------|-------|-------|---------|
| 24 | CuO@Cu <sub>2</sub> V <sub>2</sub> O <sub>7</sub> | 300 W Xe lamp | Gas-solution, H <sub>2</sub> O, TEOA | C <sub>2</sub> H <sub>4</sub> : 29.57;<br>CH <sub>4</sub> : 3.81<br>CO: 118.0 | 19.5% | 50 mg | Ref. 24 |
|----|---------------------------------------------------|---------------|--------------------------------------|-------------------------------------------------------------------------------|-------|-------|---------|

## References

- 1 G. Wang, Z. Chen, T. Wang, D. Wang and J. Mao, *Angew. Chem. Int. Ed.*, 2022, **61**, e202210789.
- 2 W. Xie, K. Li, X. H. Liu, X. Zhang and H. Huang, *Adv. Mater.*, 2022, **35**, 2208132.
- 3 W. Gao, X. Bai, Y. Gao, J. Liu, H. He, Y. Yang, Q. Han, X. Wang, X. Wu, J. Wang, F. Fan, Y. Zhou, C. Li and Z. Zou, *Chem. Commun.*, 2020, **56**, 7777–7780.
- 4 C. Chen, T. Wang, K. Yan, S. Liu, Y. Zhao and B. Li, *Inorg. Chem. Front.*, 2022, **9**, 4753-4767.
- 5 T. Wang, L. Chen, C. Chen, M. Huang, Y. Huang, S. Liu and B. Li, *ACS Nano*, 2022, **16**, 2306–2318.
- 6 F. Tian, H. Zhang, S. Liu, T. Wu, J. Yu, D. Wang, X. Jin and C. Peng, *Appl. Catal. B: Environ.*, 2021, **285**, 119834.
- 7 S. Chakraborty, R. Das, M. Riyaz, K. Das, A. K. Singh, D. Bagchi, C. P. Vinod and S. C. Peter, *Angew. Chem. Int. Ed.*, 2022, **62**, e202216613.
- 8 F. Guo, R. X. Li, S. Yang, X. Y. Zhang, H. Yu, J. J. Urban and W. Y. Sun, *Angew. Chem. Int. Ed.*, 2023, **62**, e202216232.
- 9 J. Wang, C. Yang, L. Mao, X. Cai, Z. Geng, H. Zhang, J. Zhang, X. Tan, J. Ye and T. Yu, *Adv. Funct. Mater.*, 2023, **33**, 2213901.
- 10 W. Wang, C. Deng, S. Xie, Y. Li, W. Zhang, H. Sheng, C. Chen and J. Zhao, *J. Am. Chem. Soc.*, 2021, **143**, 2984–2993.
- 11 M. Kou, W. Liu, Y. Wang, J. Huang, Y. Chen, Y. Zhou, Y. Chen, M. Ma, K. Lei, H. Xie, P. K. Wong and L. Ye, *Appl. Catal. B: Environ.*, 2021, **291**, 120146.
- 12 X. Luo, L. Qiao, S. Zhang, Q. Li, Y. Liao, S. Rao, H. Liu and Y. Zhao, *Appl. Surf. Sci.*, 2022, **601**, 154184.
- 13 J. Park, H. Liu, G. Piao, U. Kang, H. W. Jeong, C. Janáky and H. Park, *Chem. Eng. J.*, 2022, **437**, 135388.

- 14 B. N. Choi, J. Y. Seo, Z. An, P. J. Yoo and C. H. Chung, *Chem. Eng. J.*, 2022, **430**, 132807.
- 15 Y. Liang, X. Wu, X. Liu, C. Li and S. Liu, *Appl. Catal. B: Environ.*, 2022, **304**, 120978.
- 16 Y. Luo, H. Han, G. Zhang, Q. Wang and Y. jia, *Sep. Purif. Technol.*, 2023, **314**, 123607.
- 17 Y. Wu, Q. Chen, J. Zhu, K. Zheng, M. Wu, M. Fan, W. Yan, J. Hu, J. Zhu, Y. Pan, X. Jiao, Y. Sun and Y. Xie, *Angew. Chem. Int. Ed.*, 2023, **62**, e202301075.
- 18 K. Yan, D. Wu, T. Wang, C. Chen, S. Liu, Y. Hu, C. Gao, H. Chen and B. Li, *ACS Catal.*, 2023, **13**, 2302–2312.
- 19 C. Xia, R. T. Guo, Z. X. Bi, Z. R. Zhang, C. F. Li and W. G. Pan, *Dalton Trans.*, 2023, **52**, 12742–12754.
- 20 S. Qiao, Y. Chen, Y. Tang, J. Yuan, J. Shen, D. Zhang, Y. Du, Z. Li, D. Yuan, H. Tang and C. Liu, *Chem. Eng. J.*, 2023, **454**, 140321.
- 21 Q. Wang, Y. Zhang, M. Lin, H. Wang, Y. Bai, C. Liu, J. Lu, Q. Luo, G. Wang, H. L. Jiang, T. Yao and X. Zheng, *Adv. Energy Mater.*, 2023, **13**, 2302692.
- 22 Y. Mao, M. Zhang, G. Zhai, S. Si, D. Liu, K. Song, Y. Liu, Z. Wang, Z. Zheng, P. Wang, Y. Dai, H. Cheng and B. Huang, *Adv. Sci.*, 2024, doi: 10.1002/advs.202401933.
- 23 Y. Nie, Y. Li, C. An, X. Tan, Z. Hu, J. Ye and T. Yu, *Appl. Catal. B: Environ.*, 2024, **345**, 123704.
- 24 X. Li, F. Li, S. Tong, Y. Cao, Y. Jiang, Z. Wang, W. Lu, J. Wu, T. Zhou, J. Lin and Y. Liu, *J Alloy Compd.*, 2024, **984**, 173986.
